# Supplementary material for: In situ growth of ultrafine tin oxide nanocrystals embedded in graphitized carbon nanosheets for use in high-performance lithium-ion batteries
Source: Royal Society of Chemistry journal article supplement (doi:10.1039/c4ta00021h), 2014-01-01
Supplement: c4ta00021h1.pdf [file c4ta00021h1.pdf]

## Electronic Supplementary Information

### ***In situ* growth of ultrafine tin oxide nanocrystals embedded in graphitized carbon nanosheets for high-performance lithium-ion battery anodes**

Wei Fu, Fei-Hu Du, Kai-Xue Wang,\* Tian-Nan Ye, Xiao Wei,\* and Jie-Sheng Chen

School of Chemistry and Chemical Engineering, Shanghai Jiao Tong University  
Shanghai 200240 (P. R. China)  
E-mail: [k.wang@sjtu.edu.cn](mailto:k.wang@sjtu.edu.cn)

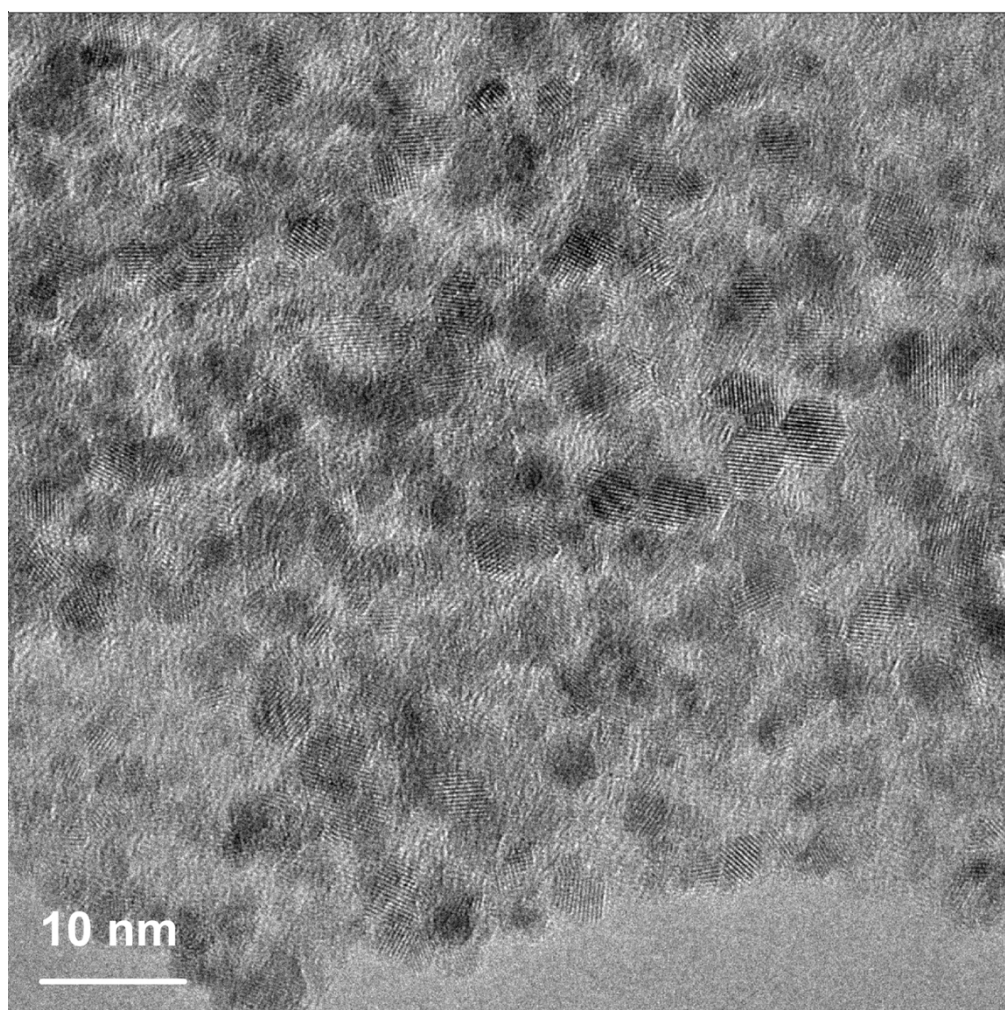

**Figure S1.** TEM image of the hybrid UTH1.

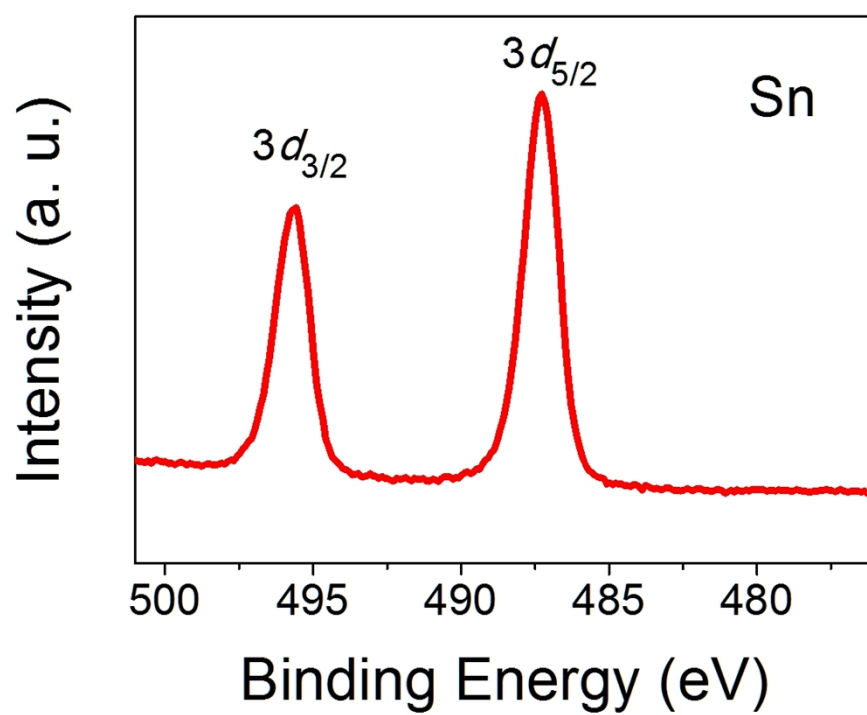

**Figure S2.** High-resolution Sn 3d XPS spectrum of the hybrid UTH1.
